# Supplementary material
Source: Royal Society of Chemistry journal article supplement (doi:10.1039/d6ta04020a)
Supplement: d6ta04020a1.pdf [file d6ta04020a1.pdf]

## Supporting Information

# **Bridging Lead Remediation and CO<sub>2</sub> Upgrading through Targeted Cation Exchange in an Ellagic Acid-based MOF**

*Song Chen, Junyao Chen, Ziyong Cheng, Jieying Hu, Hua-Qun Zhou, Lai-Hon Chung,\* Jun He\**

School of Chemical Engineering and Light Industry, Guangdong University of Technology, Guangzhou, Guangdong 510006, P. R. China

## Experimental details

### Reagents and materials.

Ellagic acid (EA, 98%, isolated from chestnut bark) was purchased from MackLin. Lead(II) chloride ( $\text{PbCl}_2$ , 99%), lead(II) nitrate ( $\text{Pb}(\text{NO}_3)_2$ , 99%), lead(II) acetate trihydrate ( $\text{Pb}(\text{OAc})_2 \cdot 3\text{H}_2\text{O}$ ), zinc nitrate ( $\text{Zn}(\text{NO}_3)_2$ , 99%), cadmium nitrate ( $\text{Cd}(\text{NO}_3)_2$ , 99%), cobalt(II) nitrate ( $\text{Co}(\text{NO}_3)_2$ , 99%), nickel(II) nitrate ( $\text{Ni}(\text{NO}_3)_2$ , 99%), *N,N*-dimethylformamide (DMF, 99.5%), *N,N*-dimethylacetamide (DMA, 99.5%), potassium bicarbonate ( $\text{KHCO}_3$ , AR), anhydrous ethanol (99.5%), dimethyl sulfoxide (DMSO, 99.8%), and deuterium oxide ( $\text{D}_2\text{O}$ , 99.9%) were purchased from Aladdin. 5 wt% Nafion solution and acetylene black were purchased from the Fuel Cell Store. All chemicals and materials were used without further purification.

### Characterizations and instruments.

Powder X-ray diffraction (PXRD) spectra of the samples were recorded on a Rigaku SmartLab diffractometer (Japan) equipped with Cu  $K\alpha$  radiation ( $\lambda = 1.54060 \text{ \AA}$ ) at 40 kV and 200 mA. Fourier transform infrared (FT-IR) spectra were collected on a Thermo Scientific Nicolet Apex FTIR. X-ray photoelectron spectroscopy (XPS) measurements were carried out on a Thermo Scientific K-Alpha spectrometer using Al  $K\alpha$  radiation ( $h\nu = 1486.6 \text{ eV}$ ). The working voltage is 12 kV, the filament current is 6 mA, and the charge correction is performed using C  $1s = 284.80 \text{ eV}$  as the energy standard. Scanning electron microscopy (SEM) images were acquired using a SU8010 microscope. Transmission electron microscopy (TEM) and high-resolution TEM (HR-TEM) images were collected on a JEOL JEM-F200 microscope operated at 120 kV. Cold field emission electron gun, rated power of 20 KW, equipped with JED-2300T EDS accessory from Japan Electronics, power consumption of 400W (detector type:  $100 \text{ mm}^2$  SDD detector), energy resolution of 129 eV (Mn- $K\alpha$ ). After proper gradient dilution, the concentration of  $\text{Pb}^{2+}$  was measured by inductively coupled plasma mass spectrometer (ICP-MS) (Thermo Fisher, ICAP RQ). The Bruker AVANCE III 400 MHz Superconducting Fourier is used to collect NMR data. Formate was quantitatively analyzed using a DIONEX AQUION RFIC ion chromatograph with an AS11-HC anion-exchange column and 1 mM KOH as the eluent.

### Preparation of SU-102.

The synthesis of **SU-102** was based on the reported method with some modifications.<sup>[1]</sup> EA (360 mg) and  $\text{ZrOCl}_2 \cdot 8\text{H}_2\text{O}$  (192 mg) were dissolved in a mixture of DMF (12 mL),  $\text{CH}_3\text{COOH}$

(9 mL), and ultrapure H<sub>2</sub>O (6 mL) in an eggplant flask. The mixture was refluxed at 90 °C for three days under stirring. After cooling to room temperature, the resulting suspension was centrifuged at 8,000 rpm for 10 minutes to collect the yellow precipitate. The solid was washed three times with ethanol and water and then dried overnight in an oven at 70 °C to afford the **SU-102** samples.

### **Preparation of SU-102-Pb.**

In a typical synthesis, **SU-102** (20 mg) and 10 mg Pb(NO<sub>3</sub>)<sub>2</sub> were placed in a 25-mL eggplant flask, followed by the addition of 3 mL of Ar-saturated ultrapure H<sub>2</sub>O and 5 mL DMA. The mixture was ultrasonicated for 5 minutes. Then, the mixture was degassed by N<sub>2</sub> bubbling for 5 minutes and sealed. The reaction mixture was subsequently heated to 70 °C with vigorous stirring for 4 hours. After cooling to room temperature, the yellow precipitate was collected by centrifugation (10,000 rpm), washed five times with ultrapure H<sub>2</sub>O and ethanol, and dried under vacuum at room temperature to yield **SU-102-Pb**. The method for synthesizing **SU-102-Pb** using lead salts with different anions is the same, except that Pb(NO<sub>3</sub>)<sub>2</sub> is replaced with an equimolar amount of PbCl<sub>2</sub> or Pb(OAc)<sub>2</sub>•3H<sub>2</sub>O.

Larger batches of **SU-102-Pb** were synthesized using 1.2 g of **SU-102** and 0.4 g Pb(NO<sub>3</sub>)<sub>2</sub> (3 mmol), which were added to an eggplant flask containing 100 mL of DMA and 60 mL of water. The reaction mixture was subsequently heated to 70 °C with vigorous stirring for 6 hours. After cooling to room temperature, the yellow precipitate was collected by centrifugation (10,000 rpm), washed 5 times with ultrapure H<sub>2</sub>O and ethanol, and dried under vacuum at room temperature to yield **SU-102-Pb** (large scale).

### **Synthesis of SU-102-Pb from simulated lead-acid battery wastewater.**

The industrial wastewater from lead-acid battery factories is often acidic, high-concentration, lead-containing wastewater with typical characteristics such as suspended solids, chemical oxygen demand, and turbulence.<sup>[2]</sup> Therefore, we used natural lake water as the primary water source (Figure S3) and filtered it only through a 0.22-micron membrane to remove common insoluble substances. Then, ions commonly found in industrial wastewater from lead-acid battery factories (Pb<sup>2+</sup>, Cd<sup>2+</sup>, Zn<sup>2+</sup>, Co<sup>2+</sup>, Ni<sup>2+</sup>) were added and adjusted to acidic pH using HCl (Table S2). Then, **SU-102** (20 mg) was placed in a 25 mL eggplant flask, followed by the addition of 3 mL of simulated wastewater and 5 mL DMA. The mixture was ultrasonicated for 5 minutes. Then, the mixture was degassed by N<sub>2</sub> bubbling for 5 minutes and sealed. The reaction mixture was subsequently heated to 70 °C with vigorous stirring for 4

hours. After cooling to room temperature, the yellow precipitate was collected by centrifugation (10,000 rpm), washed five times with ultrapure H<sub>2</sub>O and ethanol, and dried under vacuum at room temperature to yield **SU-102-Pb** (named industrial wastewater).

### **The preparation of the working electrode.**

To improve the catalyst's dispersibility and the electrode's conductivity, 10 mg of ground samples and 10 mg of acetylene black (AB) were ground together. Then the mixture was added to a 1 mL solution [ethanol (500  $\mu$ L), H<sub>2</sub>O (400  $\mu$ L), and Nafion solution (5 wt%, 100  $\mu$ L)] to produce a black suspension. After 30 minutes of sonication, a uniformly mixed 50  $\mu$ L suspension was directly spray-coated onto hydrophobic carbon paper (1  $\times$  2 cm<sup>2</sup>) to form a 1  $\times$  1 cm<sup>2</sup> catalyst area with a catalyst loading density of  $\sim$ 0.5 mg cm<sup>-2</sup>.

### **Electrochemical measurements.**

All electrochemical measurements were carried out in a three-electrode system using a sealed, two-compartment H-type cell separated by a Nafion-117 proton-exchange membrane. Each compartment was filled with 40 mL KHCO<sub>3</sub> solution (0.5 M). A saturated Ag/AgCl and a carbon rod were used as the reference and counter electrodes, respectively. In this work, all the potentials were converted to the reversible hydrogen electrode (RHE) using the formula  $E_{\text{RHE}} = E_{\text{Ag/AgCl}} + E^{\theta}_{\text{Ag/AgCl}} + 0.0592 \times \text{pH}$ . Electrochemical measurements were performed using a CHI660E workstation. Before electrochemical measurement, the electrolyte was completely degassed by purging with high-purity Ar or CO<sub>2</sub> at a flow rate of 20 mL min<sup>-1</sup> for 30 minutes, and linear sweep voltammetry (LSV) was performed at a scanning rate of 5 mV s<sup>-1</sup>. Chronoamperometry (CA) was measured at fixed potentials to evaluate the performance of CO<sub>2</sub>RR. The faradaic efficiencies (FEs) of products were calculated according to the following equation:  $FE_{\text{products}} = (N \times F \times n_{\text{products}}) / Q \times 100\%$ ,  $N$  is the number of electrons transferred for products ( $N = 2$  for CO<sub>2</sub>-to-CO/HCOOH conversion and H<sub>2</sub>O-to-H<sub>2</sub> conversion),  $F$  is the Faraday constant (96485 C mol<sup>-1</sup>),  $n_{\text{products}}$  is the moles of products (mol) and  $Q$  is the total charge obtained from chronoamperometry (C).

The gaseous reduction products of CO<sub>2</sub>RR were monitored by a gas chromatograph (Fuli GC9790Plus, argon as a carrier gas) equipped with a flame ionization detector (FID for CO detection) and a thermal conductivity detector (TCD for H<sub>2</sub> detection). The electrolyte solution was collected from the cathode chamber after electrolysis and characterized by <sup>1</sup>H NMR, with the electrolyte (0.45 mL) mixed with D<sub>2</sub>O (0.15 mL) and DMSO-*d*<sub>6</sub> (2 mM, 0.02 mL). In addition, quantitative analysis of the electrolyte solution collected from the cathode chamber was performed using the NMR internal-standard method and ion chromatography.

### ***In situ* FT-IR study.**

The *in situ* FT-IR study was carried out on a Thermo Scientific Nicolet Apex spectrometer equipped with an MCT detector cooled with liquid N<sub>2</sub>. The Pt-coated Si hemispherical prism (20 mm in diameter, MTI Corporation) was used as the conductive substrate for the catalyst and the IR reflection element. The catalyst suspensions were dropped on the Pt/Si surface as the working electrode. An Ag/AgCl electrode and a Pt wire were used as the reference and counter electrodes, respectively. A CO<sub>2</sub>-saturated 0.5 M KHCO<sub>3</sub> solution was used as an electrolyte for the CO<sub>2</sub> reduction reaction.

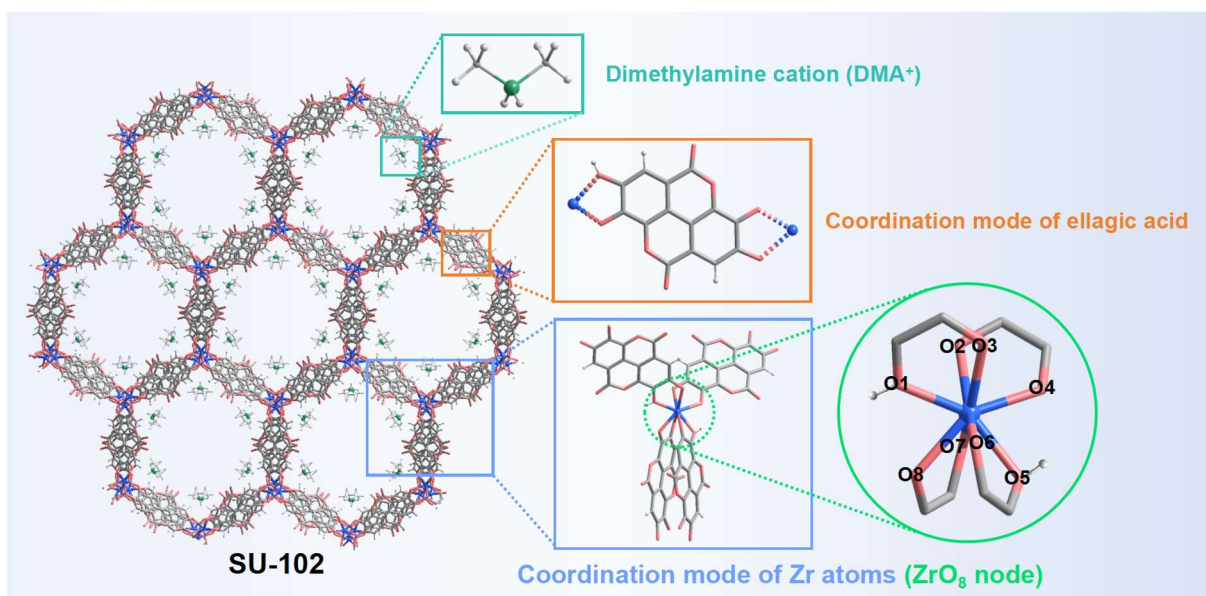

**Fig. S1.** Schematic diagram of the **SU-102** structure: ligand coordination mode, Zr atom coordination mode, and counter cation.

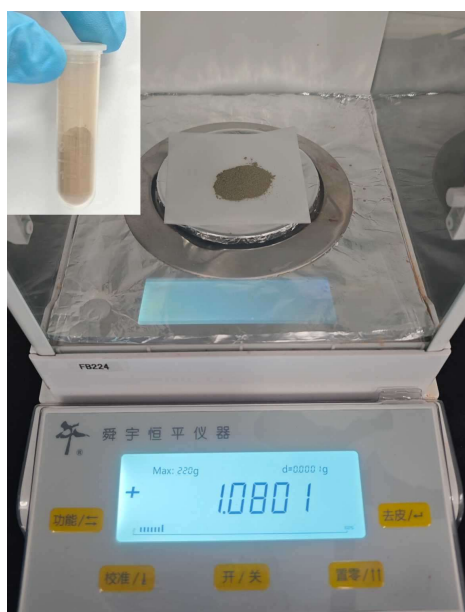

**Fig. S2.** Optical photos of gram-scale synthesis of **SU-102-Pb**.

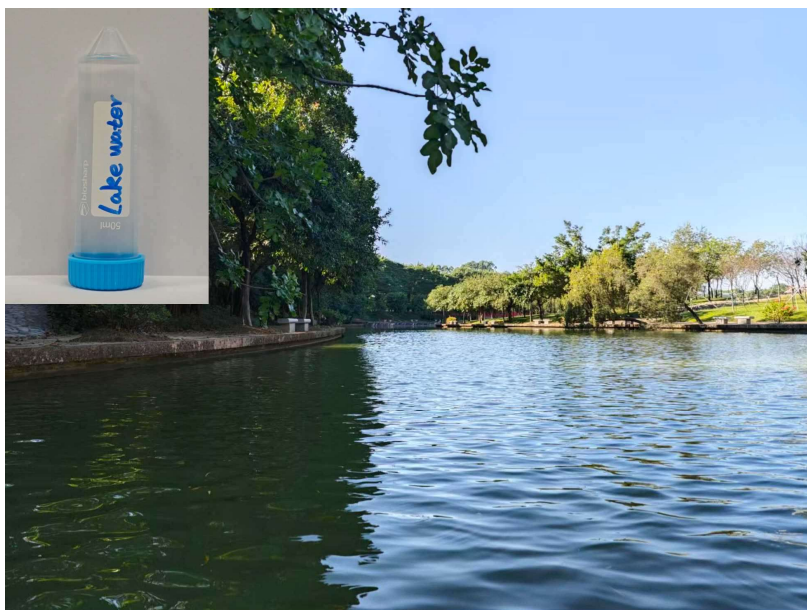

Fig. S3. Optical photos of natural lake water (the top left picture shows the sample).

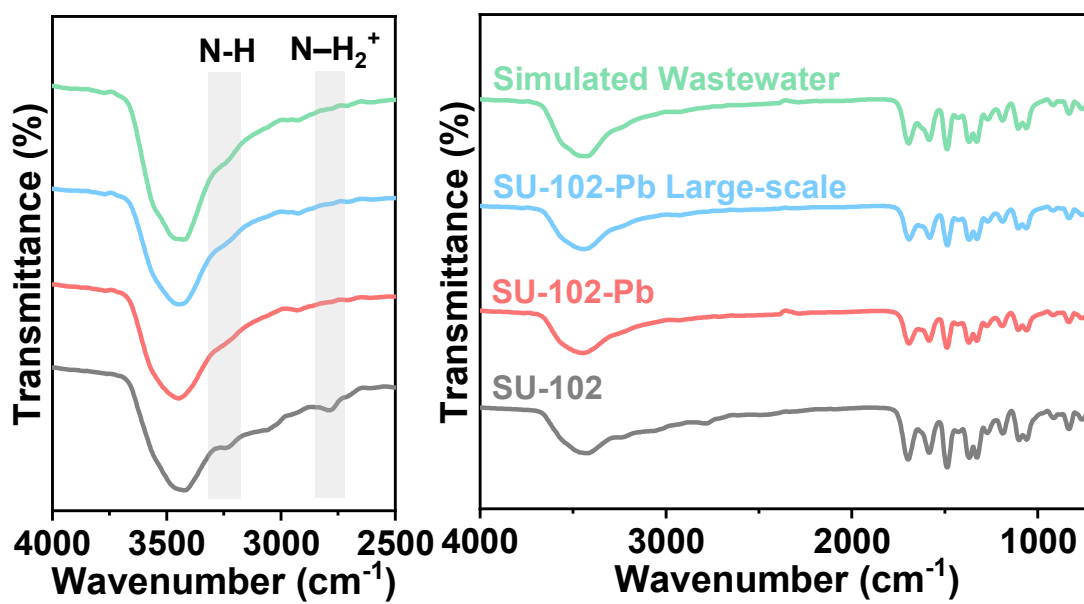

Fig. S4. FT-IR spectra of SU-102 and SU-102-Pb.

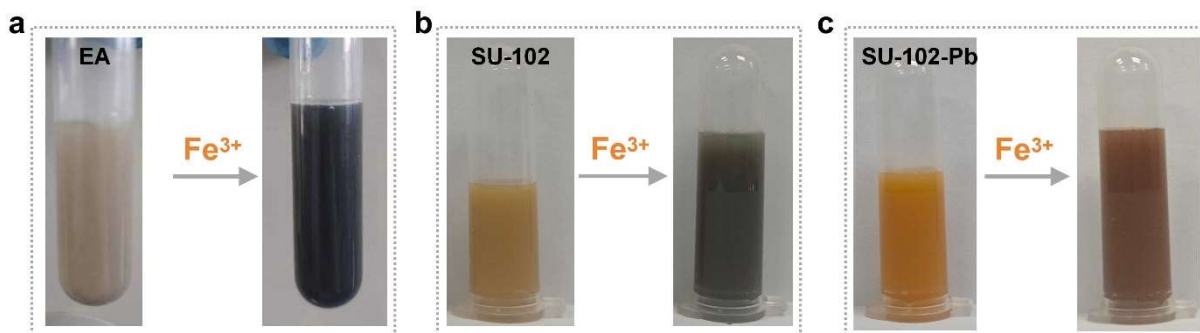

**Fig. S5.** Optical photos of color changes before and after introducing  $\text{Fe}^{3+}$  into EA, SU-102, and SU-102-Pb suspensions, respectively.

*Note:* It is reported that hydroxyl groups strongly chelate  $\text{Fe}^{3+}$ , combine quickly, and form a black product.<sup>[3]</sup> As shown in Figure S5a, the reaction between EA and  $\text{Fe}^{3+}$  rapidly produces black products. In Figure S5b, the reaction between SU-102 and  $\text{Fe}^{3+}$  also produces a black product quickly, but the color is lighter than EA because only a small amount of  $-\text{OH}$  remains in SU-102.<sup>[1]</sup> In Figure S5c, the reaction between SU-102-Pb and  $\text{Fe}^{3+}$  also deepens the sample color, which indicates that there is still  $-\text{OH}$  in the MOF, but the color is even lighter because Pb has previously combined with  $-\text{OH}$ , which forms steric hindrance around  $-\text{OH}$ , hindering the reaction between  $\text{Fe}^{3+}$  and  $-\text{OH}$ .

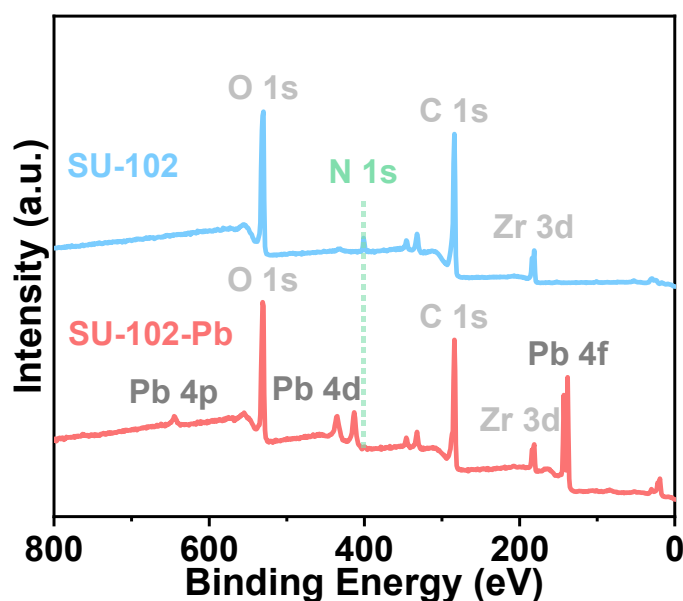

**Fig. S6.** XPS Survey spectra of SU-102 and SU-102-Pb.

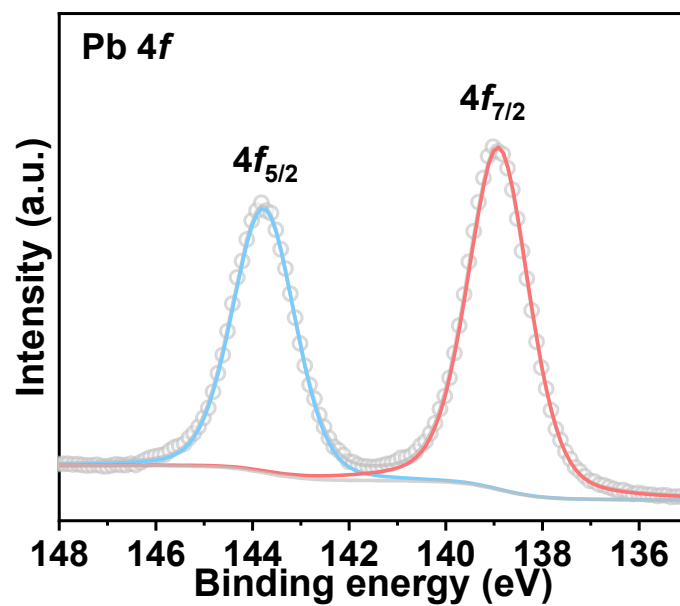

Fig. S7. XPS Pb  $4f$  spectrum of SU-102-Pb.

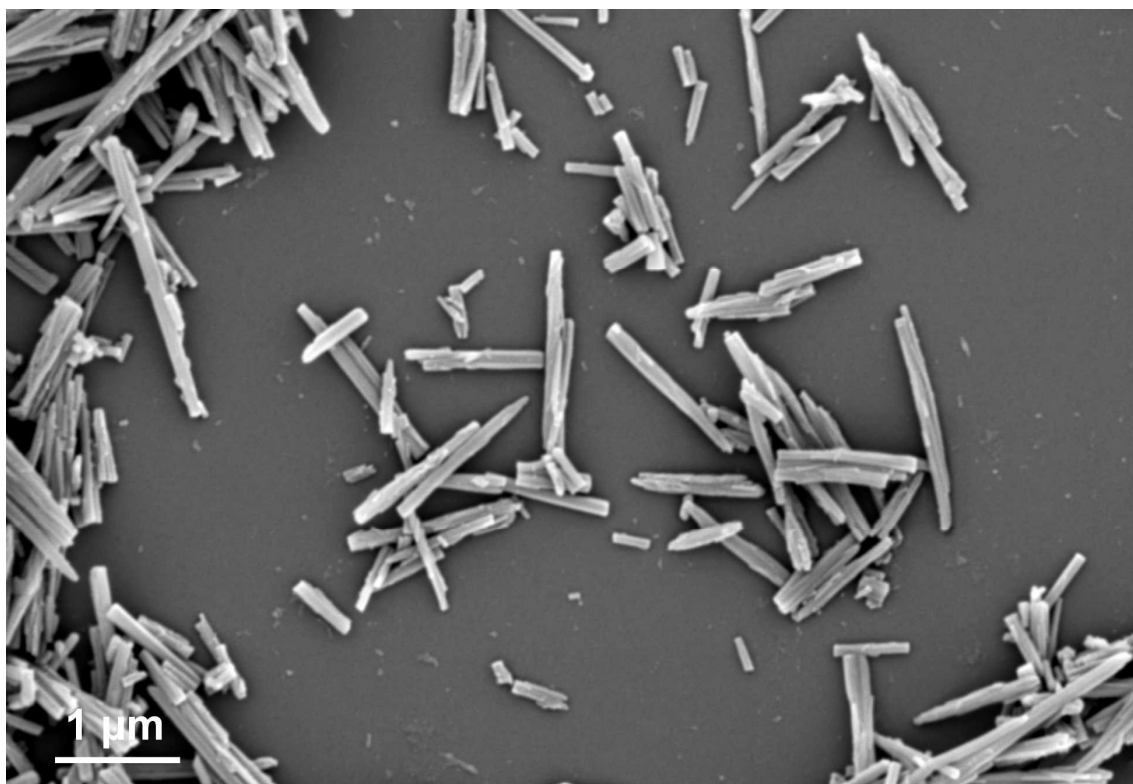

Fig. S8. SEM image of SU-102.

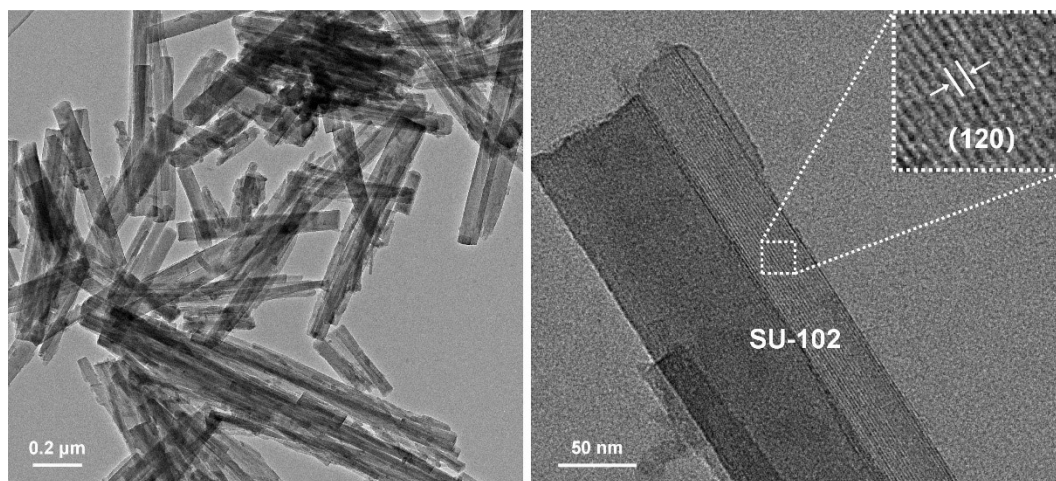

**Fig. S9.** TEM images of SU-102 (inset showing lattice fringe of SU-102).

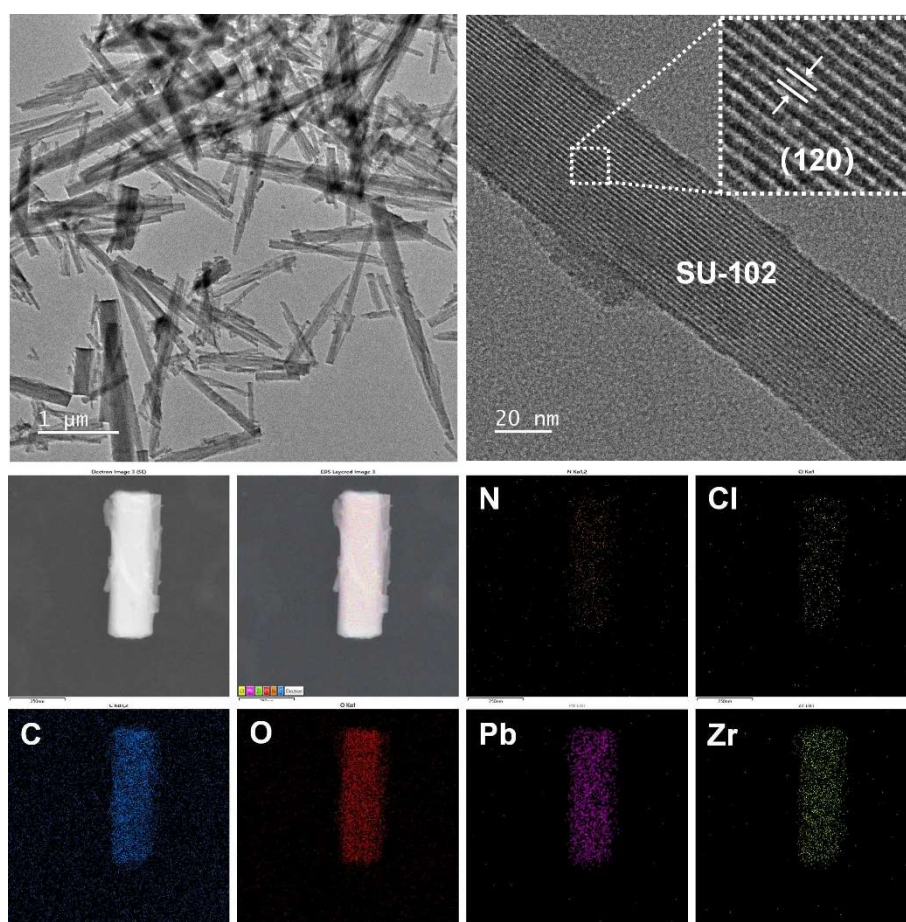

**Fig. S10.** TEM image of SU-102-Pb (inset showing lattice fringe of SU-102-Pb) and the corresponding elemental mapping of C, N, O, Cl, Zr and Pb.

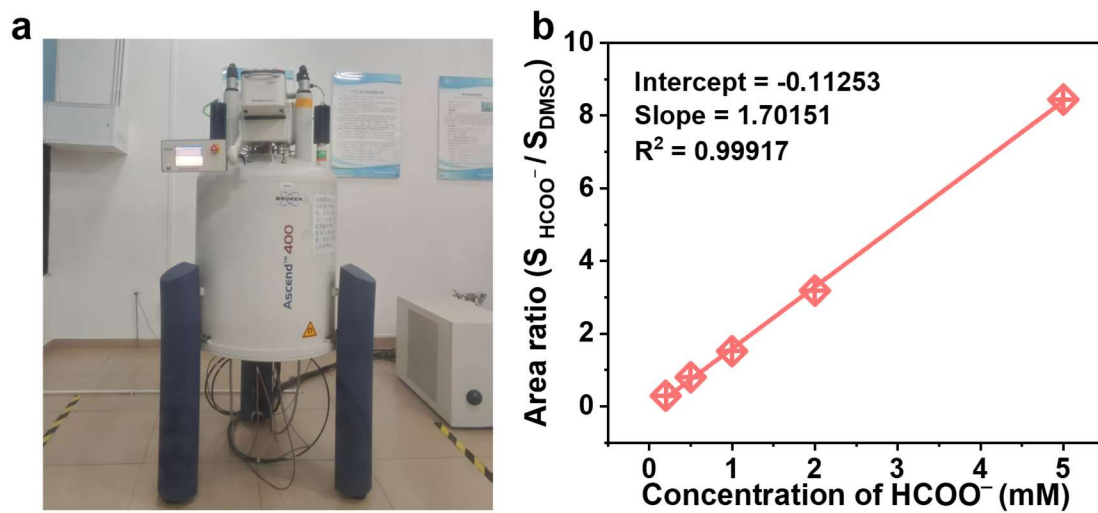

**Fig. S11.** (a) Bruker AVANCE III 400 MHz Nuclear Magnetic Resonance Spectrometer. (b) Standard curve of CO<sub>2</sub>RR product (HCOO<sup>-</sup>).

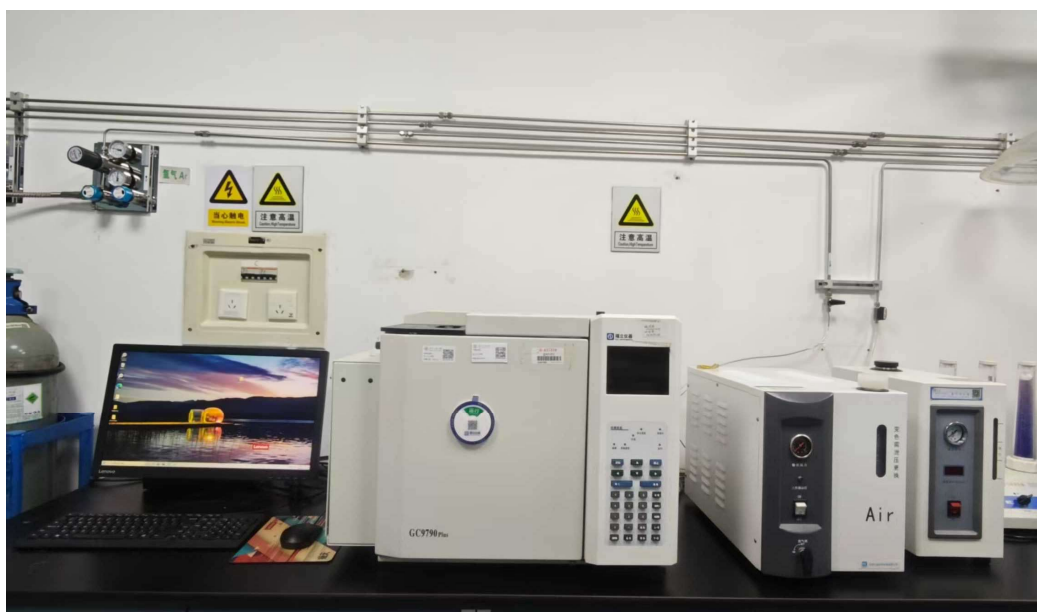

**Fig. S12.** Optical photograph of gas chromatography.

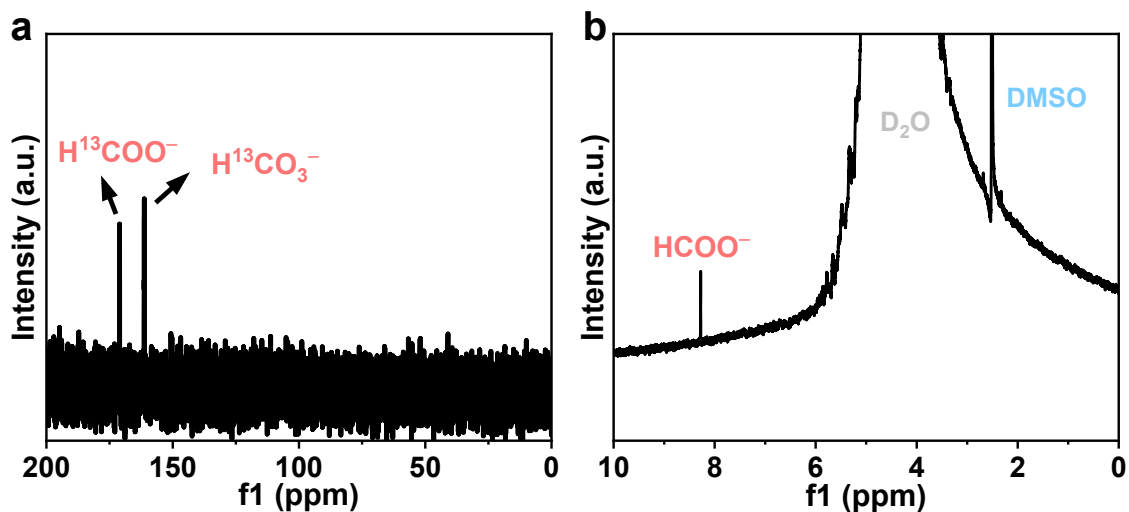

**Fig. S13.**  $^1\text{H}$  NMR and  $^{13}\text{C}$  NMR of eCO<sub>2</sub>RR products from SU-102-Pb.

*Note:* The  $\text{H}^{13}\text{COO}^-$  signal arises from the natural abundance of  $^{13}\text{C}$  ( $^{12}\text{C}$ : 98.9%,  $^{13}\text{C}$ : 1.1%). Although there is significant interference, the presence of this signal still proves that the electrolytic product is only  $\text{HCOO}^-$ .

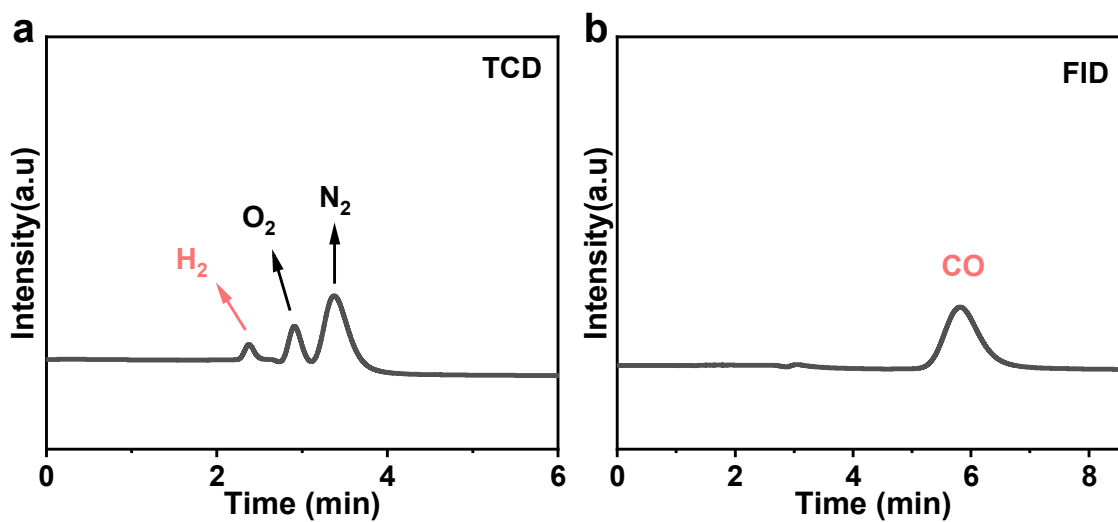

**Fig. S14.** Gas chromatograms of gas products collected after electrolysis.

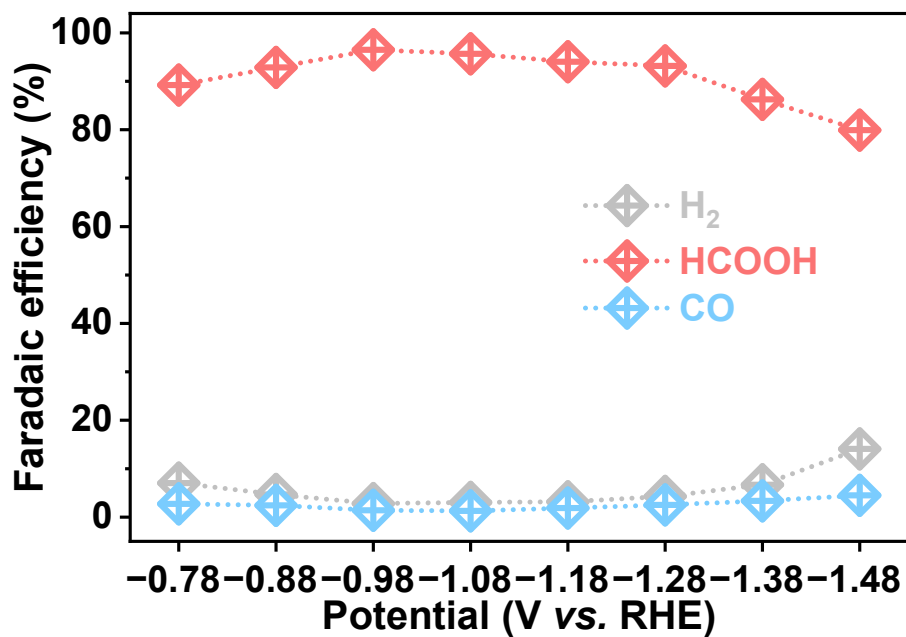

Fig. S15. *FEs* corresponding to HCOO<sup>-</sup>, CO and H<sub>2</sub> of SU-102-Pb at different potentials.

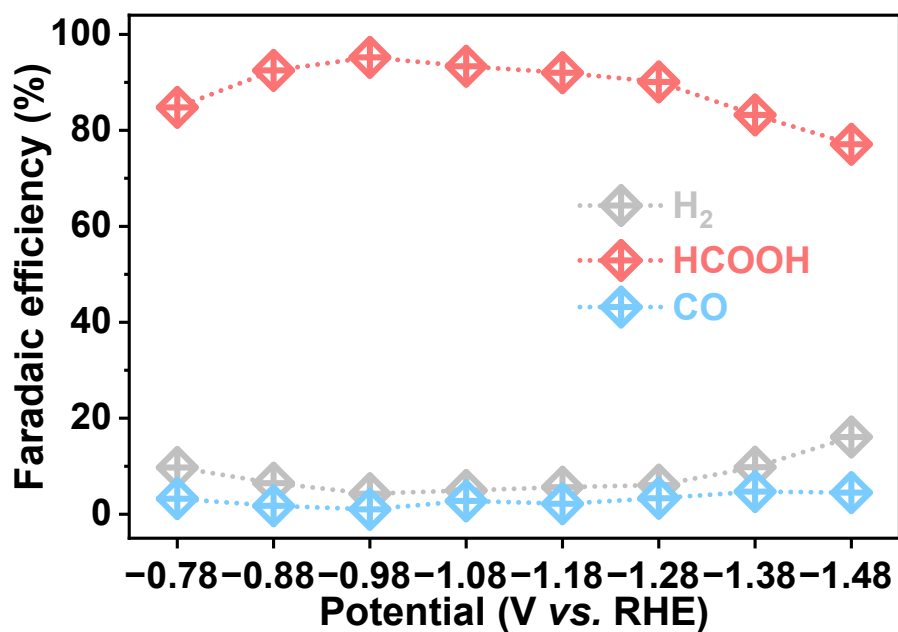

Fig. S16. *FEs* corresponding to HCOO<sup>-</sup>, CO and H<sub>2</sub> of SU-102-Pb (large scale) at different potentials.

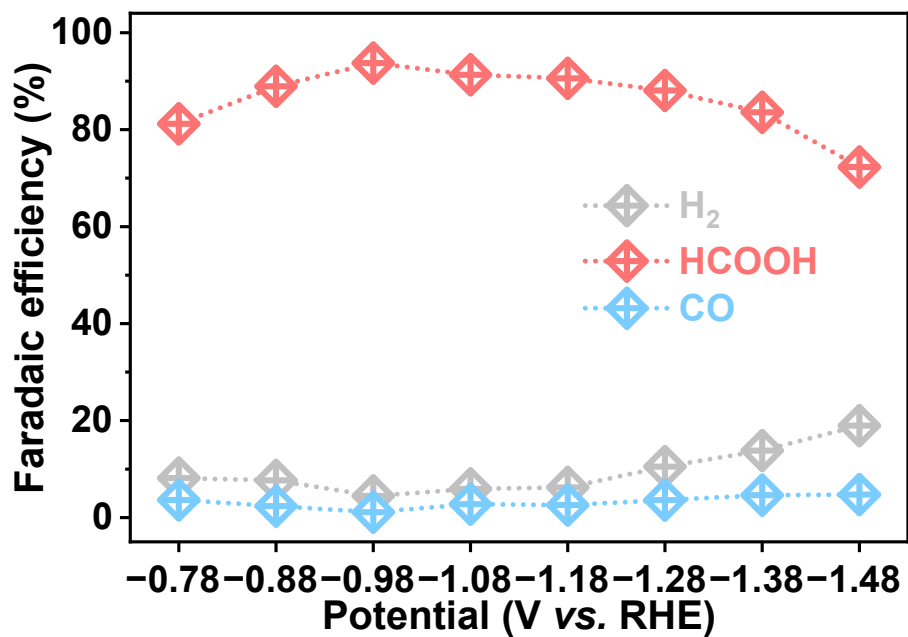

**Fig. S17.** FEs corresponding to HCOO<sup>-</sup>, CO and H<sub>2</sub> of SU-102-Pb (industrial wastewater) at different potentials.

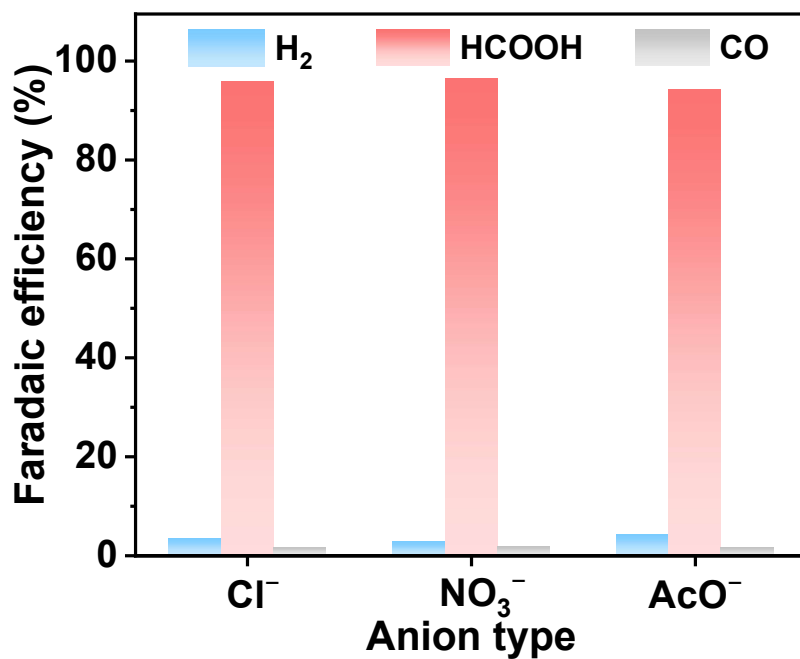

**Fig. S18.** FEs of CO<sub>2</sub>RR at optimal voltage for SU-102-Pb catalysts synthesized using different Pb salts.

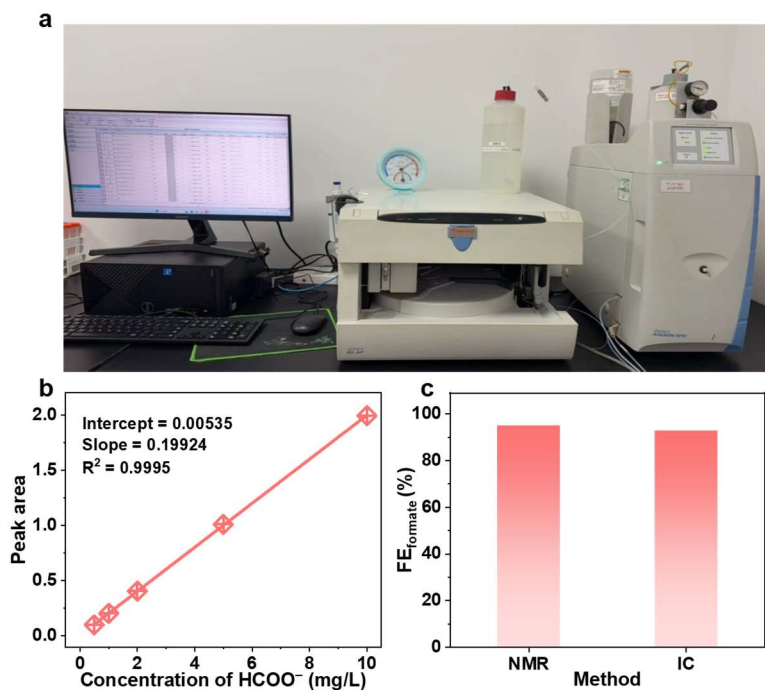

**Fig. S19.** (a) Optical photos of DIONEX AQUION RFIC ion chromatography. (b) Standard curve of CO<sub>2</sub>RR product (HCOO<sup>-</sup>). (c) The *FE*s of HCOO<sup>-</sup> were quantified by NMR and IC methods, respectively.

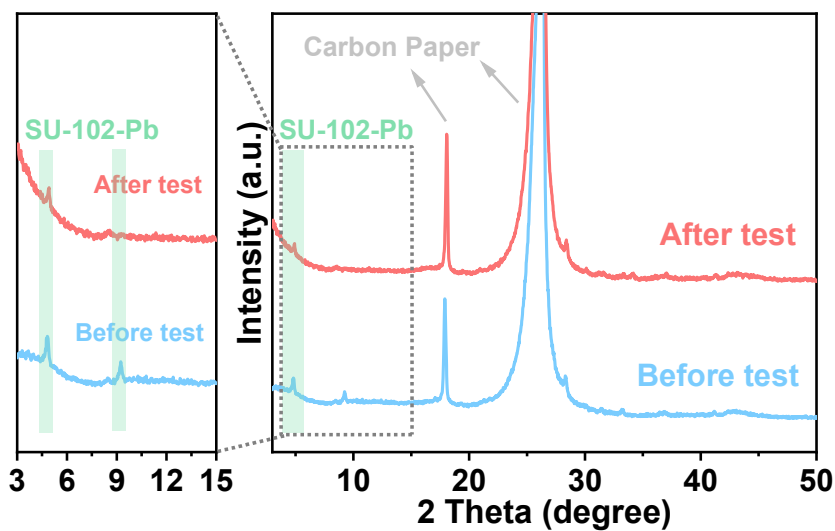

**Fig. S20.** PXRD patterns of SU-102-Pb before and after electrolysis. The weak diffraction peaks of SU-102-Pb arise largely from the low sample loading (0.5 mg MOF distributed on 1 cm<sup>2</sup> carbon paper).

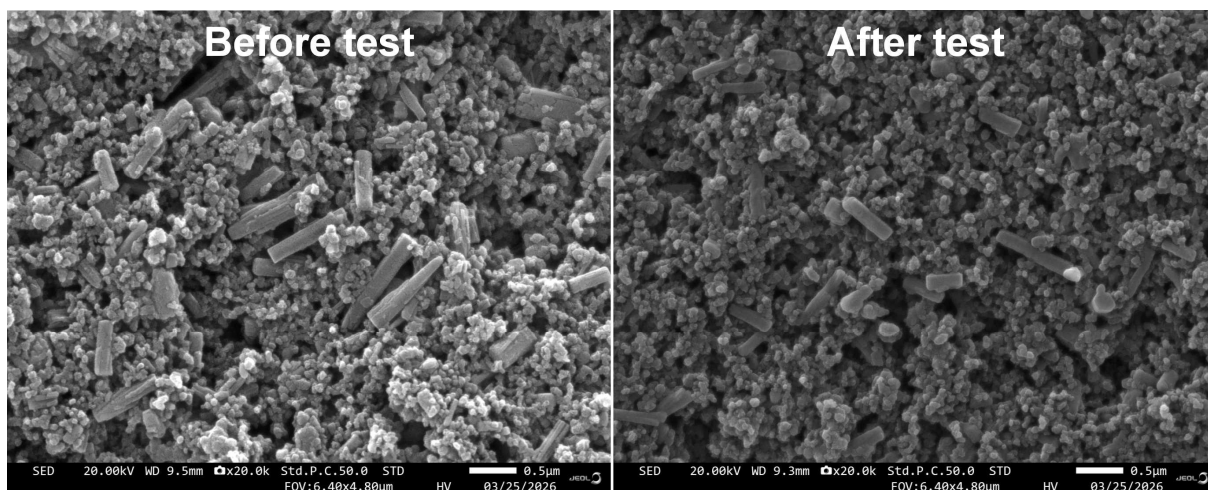

Fig. S21. SEM images of SU-102-Pb before and after long-term catalysis.

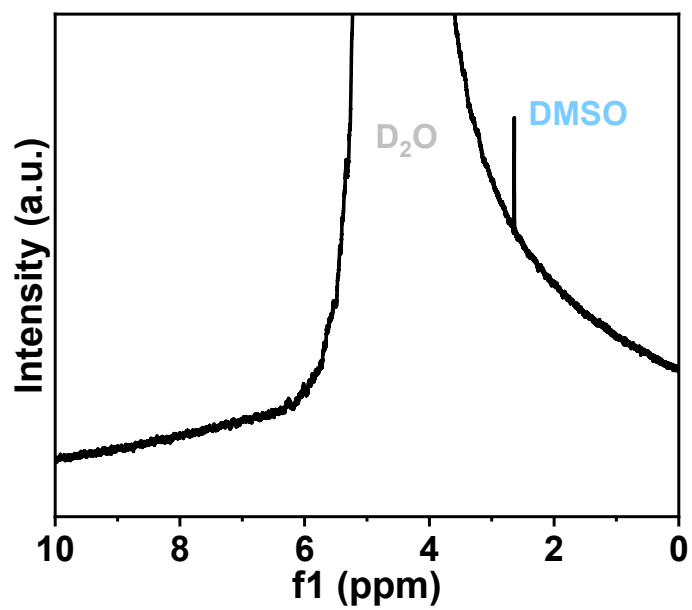

Fig. S22. <sup>1</sup>H NMR spectra of the electrolyte after electrolysis without a catalyst.

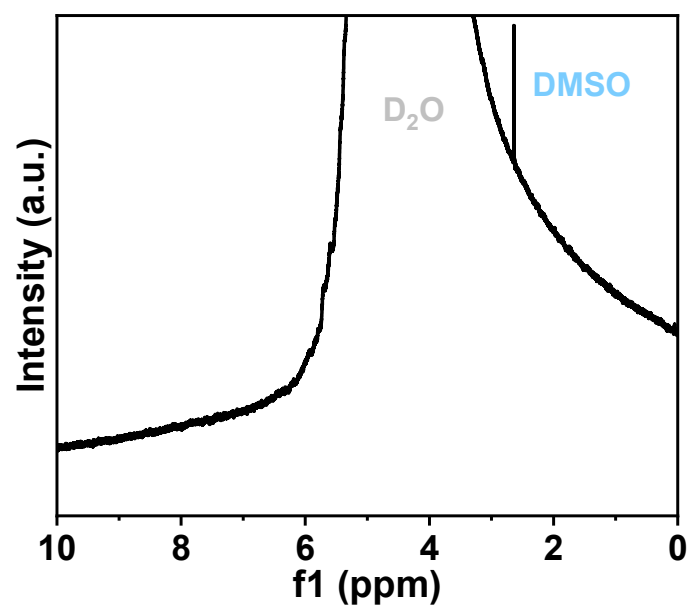

**Fig. S23.** <sup>1</sup>H NMR spectrum of electrolyte after electrolysis without CO<sub>2</sub>.

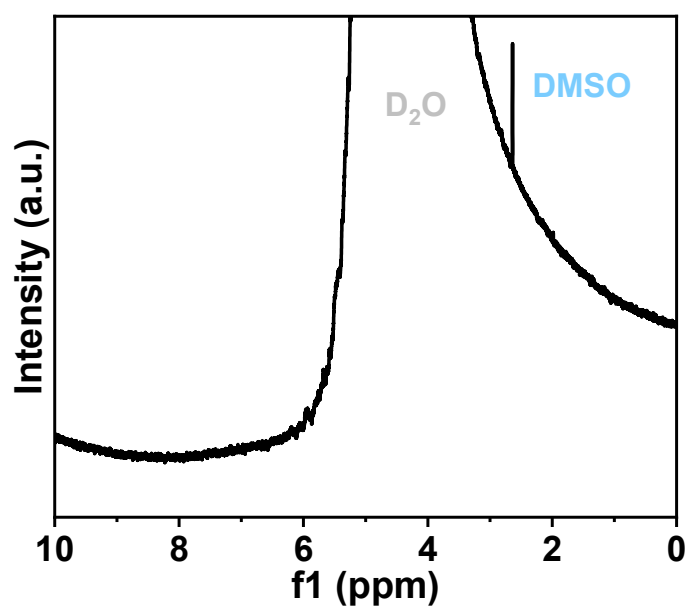

**Fig. S24.** <sup>1</sup>H NMR spectrum of eCO<sub>2</sub>RR products from SU-102.

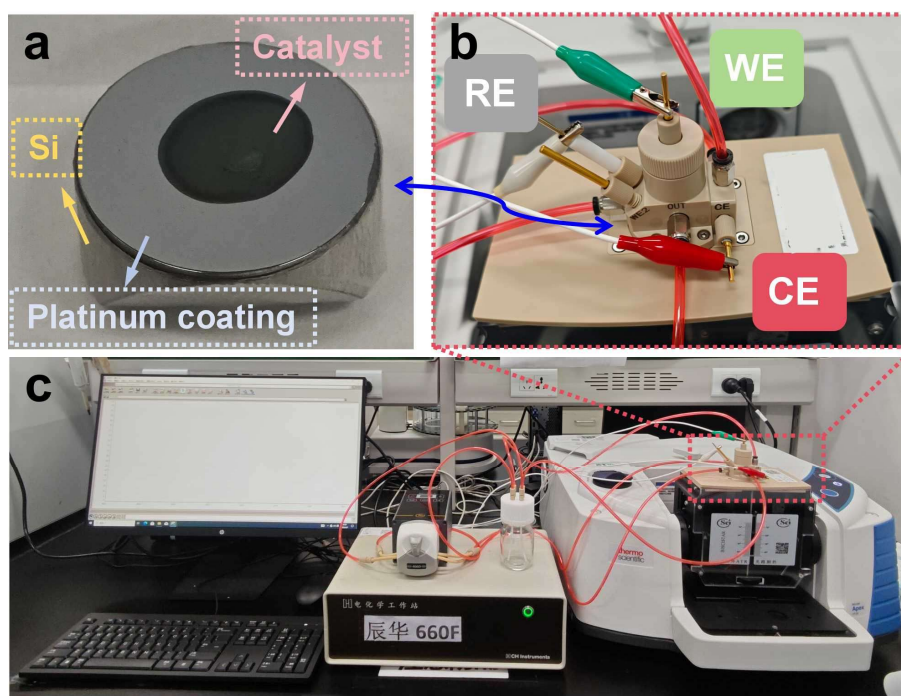

**Fig. S25.** The labeled photos of the experimental setup for *in situ* DRIFTS measurement: (a) Monocrystalline silicon, surface platinum layer, and sample coating. (b) Customized *in situ* infrared spectroscopy electrolytic cell. (c) Photo of an *in situ* testing device.

**Table S1.** Changes of Pb<sup>2+</sup> concentration and removal rate after **SU-102-Pb** synthesis under different feed ratios and conditions.

| Pb <sup>2+</sup> concentrations (ppm) | Water source status            | Pb <sup>2+</sup> removal rate (%) |
|---------------------------------------|--------------------------------|-----------------------------------|
| 36                                    | pure water pH = 7              | 98.87                             |
| 36                                    | industrial wastewater pH = 3.3 | 98.14                             |
| 360                                   | pure water pH = 7              | 98.84                             |
| 360                                   | industrial wastewater pH = 3.3 | 98.46                             |
| 694                                   | pure water pH = 7              | 98.64                             |
| 694                                   | industrial wastewater pH = 3.3 | 98.29                             |

**Table S2.** Simulated lead-acid battery wastewater quality parameter table.

| Parameters                   | Unit  | Value  |
|------------------------------|-------|--------|
| pH                           | /     | 3.3    |
| Suspended solids (SS)        | mg/L  | 16     |
| Chemical oxygen demand (COD) | mg/L  | 24.7   |
| Conductivity                 | mS/cm | 13.45  |
| Turbidity                    | NTU   | 0.3    |
| TOC                          | mg/L  | 8.68   |
| Pb <sup>2+</sup>             | mg/L  | 694.53 |
| Zn <sup>2+</sup>             | mg/L  | 60.38  |
| Cd <sup>2+</sup>             | mg/L  | 42.64  |
| Ni <sup>2+</sup>             | mg/L  | 17.3   |
| Co <sup>2+</sup>             | mg/L  | 20.54  |

**Table S3.** Elemental analysis and comparison of **SU-102** before and after  $\text{Pb}^{2+}$  incorporation.

| <b>Sample</b>    | <b>N (%)</b> | <b>C (%)</b> | <b>H (%)</b> | <b>S (%)</b> |
|------------------|--------------|--------------|--------------|--------------|
| <b>SU-102</b>    | 2.27         | 40.40        | 3.86         | 0.00         |
| <b>SU-102-Pb</b> | 0.00         | 27.50        | 2.55         | 0.00         |

**Table S4.** Pb content of **SU-102-Pb** determined by ICP-OES analysis.

| <b>Catalyst</b>                          | <b>Pb (wt%)</b> |
|------------------------------------------|-----------------|
| <b>SU-102-Pb</b>                         | 19.68           |
| <b>SU-102-Pb</b> (large scale)           | 17.84           |
| <b>SU-102-Pb</b> (industrial wastewater) | 16.98           |
| <b>SU-102-PbCl<sub>2</sub></b>           | 19.16           |
| <b>SU-102-Pb(OAc)<sub>2</sub></b>        | 18.49           |

**Table S5.** ICP analysis of various metal ion contents in **SU-102-Pb** (industrial wastewater) samples.

| <b>Sample</b>    | <b>Pb (wt%)</b> | <b>Cd (wt%)</b> | <b>Co (wt%)</b> | <b>Ni (wt%)</b> | <b>Zn (wt%)</b> |
|------------------|-----------------|-----------------|-----------------|-----------------|-----------------|
| <b>SU-102-Pb</b> | 16.98           | 0.0511          | 0.0396          | 0.0414          | 0.0627          |

**Table S6.** The content of Zr ions in the supernatant of **SU-102-Pb** synthesis.

| <b>Test element</b> | <b>Concentration (ppb)</b> |
|---------------------|----------------------------|
| Zr                  | 0.2031                     |

**Table S7.** The content of Pb ions in the electrolyte after long-term electrolysis

| <b>Sample</b>    | <b>Test time (h)</b> | <b>Test element</b> | <b>Concentration (ppb)</b> |
|------------------|----------------------|---------------------|----------------------------|
| <b>SU-102-Pb</b> | 6                    | Pb                  | 135.6                      |

**Table S8.** Comparison of the performance of **SU-102-Pb** and reported Pb-based catalysts in H-type electrolytic cells under neutral conditions.

| Catalysts                                                            | Electrolyte                   | Electrolysis potential (V vs. RHE) | Partial current density (mA cm <sup>-2</sup> ) | FE (%)      | Window (mV) | Reference        |
|----------------------------------------------------------------------|-------------------------------|------------------------------------|------------------------------------------------|-------------|-------------|------------------|
| Zn(Pb)                                                               | 0.1M KHCO <sub>3</sub>        | -1.2                               | -47                                            | 95          | 200         | 4                |
| Pb dendrites                                                         | 1 M KHCO <sub>3</sub>         | -0.99                              | -7.5                                           | 97          | 300         | 5                |
| Nanolayered Pb                                                       | 0.1 M KHCO <sub>3</sub>       | -1.1                               | N/A                                            | 94          | 400         | 6                |
| Oxide-derived Pb                                                     | 0.5 M NaHCO <sub>3</sub>      | -0.8                               | -0.6                                           | 98          | 300         | 7                |
| Amine-modified Pb                                                    | 1 M KHCO <sub>3</sub>         | -1.29                              | -24                                            | 80          | 200         | 8                |
| Oxide-derived Sn-Pb-Sb                                               | 0.1 M KHCO <sub>3</sub>       | -1.4                               | -8.3                                           | 91          | 200         | 9                |
| Sulfide-derived Pb                                                   | 0.1 M KHCO <sub>3</sub>       | -1.08                              | -12                                            | 88          | 100         | 10               |
| TA-Pb                                                                | 0.5 M NaHCO <sub>3</sub>      | -0.92                              | -0.4                                           | 96.4        | 300         | 11               |
| Roughened Pb                                                         | 0.1M KHCO <sub>3</sub>        | -0.96                              | -1.2                                           | 88          | 100         | 12               |
| [Pb <sub>3</sub> (CO <sub>3</sub> ) <sub>2</sub> (OH) <sub>2</sub> ] | 0.1 M KHCO <sub>3</sub>       | -0.98                              | -7.3                                           | 96.8        | 200         | 13               |
| PbNP/MWCNT/CPE                                                       | 0.5 M KHCO <sub>3</sub>       | -1.03                              | -28                                            | 84.6        | 100         | 14               |
| Pb-PhyA                                                              | Ionic Liquid                  | -1.58                              | -30                                            | 92.7        | 400         | 15               |
| Co-PbCO <sub>3</sub>                                                 | 0.1 M KHCO <sub>3</sub>       | -0.7                               | -21.52                                         | 98.15       | 200         | 16               |
| Pb <sub>7</sub> Sn <sub>1</sub>                                      | 0.5 M KHCO <sub>3</sub>       | -1.23                              | -11                                            | 90.53       | 200         | 17               |
| Pb <sub>7</sub> In <sub>3</sub>                                      | 0.5 M KHCO <sub>3</sub>       | -1.26                              | -17                                            | 91.6        | 100         | 18               |
| PbS                                                                  | 0.1 M KHCO <sub>3</sub>       | -1.2                               | -5.2                                           | 97.6        | 300         | 19               |
| Pb(111)                                                              | 0.1 M KHCO <sub>3</sub>       | -0.83                              | -2.4                                           | 98.3        | 400         | 20               |
| EA-Pb                                                                | 0.1 M KHCO <sub>3</sub>       | -1.08                              | -6.5                                           | 95.37       | 500         | 21               |
| Porous Pb                                                            | 0.5 M KHCO <sub>3</sub>       | -1.7 (vs. SCE)                     | -10                                            | 96.8        | 300         | 22               |
| Pb <sub>1</sub> Cu                                                   | 0.5 M KHCO <sub>3</sub>       | -0.72                              | N/A                                            | 95.7        | 600         | 23               |
| PbSA <sub>100</sub> -Cu/Cp                                           | 0.5 M KHCO <sub>3</sub>       | -0.9                               | -27.9                                          | 97          | 300         | 24               |
| Bi-Pb                                                                | 0.5 M KHCO <sub>3</sub>       | -0.8                               | -53.1                                          | 97.8        | 400         | 25               |
| BiPbO <sub>2</sub> Br                                                | 0.5 M KHCO <sub>3</sub>       | -0.9                               | -40                                            | 96.6        | 400         | 26               |
| <b>SU-102-Pb</b>                                                     | <b>0.5 M KHCO<sub>3</sub></b> | <b>-0.98</b>                       | <b>-17</b>                                     | <b>96.5</b> | <b>600</b>  | <b>This Work</b> |

## Reference

- [1] E. S. Grape, A. J. Chacón-García, S. Rojas, Y. Pérez, A. Jaworski, M. Nero, M. Åhlén, E. Martínez-Ahumada, A. E. G. Feindt, M. Pepillo, M. Narongin-Fujikawa, I. A. Ibarra, O. Cheung, C. Baresel, T. Willhammar, P. Horcajada, A. K. Inge, *Nat. Water* **2023**, *1*, 433–442.
- [2] Y. Wang, Y. Shang, Z. Fu, K. Li, J. Shi, L. Xu, P. Jin, X. Jin, X. C. Wang, *J. Hazard. Mater.* **2025**, *490*, 137670.
- [3] a) S. Chen, Y. Qian, Z. Cheng, L.-H. Chung, W. Ou, J. Hu, Q. Mo, S. Chen, J. He, H.-L. Jiang, *Angew. Chem. Int. Ed.* **2026**, *65*, e8338805; b) G. Zhang, S. A. Amin, F. C. Küpper, P. D. Holt, C. J. Carrano, A. Butler, *Inorg. Chem.* **2009**, *48*, 11466–11473; c) N. von Wirén, H. Khodr, R. C. Hider, *Plant Physiol.* **2020**, *124*, 1149–1157.
- [4] A. G. A. Mohamed, E. Zhou, Z. Zeng, J. Xie, D. Gao, Y. Wang, *Adv. Sci.* **2022**, *9*, 2104138.
- [5] M. Fan, S. Garbarino, G. A. Botton, A. C. Tavares, D. Guay, *J. Mater. Chem. A* **2017**, *5*, 20747–20756.
- [6] Y. Kwon, J. Lee, *Electrocatal.* **2010**, *1*, 108–115
- [7] C. H. Lee, M. W. Kanan, *ACS Catal.* **2015**, *5*, 465–469.
- [8] N. Zouaoui, B. D. Osseonon, M. Fan, D. Mayilukila, S. Garbarino, G. de Silveira, G. A. Botton, D. Guay, A. C. Tavares, *J. Mater. Chem. A* **2019**, *7*, 11272–11281.
- [9] S. Rasul, A. Pugniant, H. Xiang, J.-M. Fontmorin, E. H. Yu, *J CO<sub>2</sub> Util.* **2019**, *32*, 1–10
- [10] J. E. Pander, J. W. J. Lum, B. S. Yeo, *J. Mater. Chem. A* **2019**, *7*, 4093–4101.
- [11] Y. Shi, Y. Ji, J. Long, Y. Liang, Y. Liu, Y. Yu, J. Xiao, B. Zhang, *Nat. Commun.* **2020**, *11*, 3415.
- [12] Z. He, J. Shen, Z. Ni, J. Tang, S. Song, J. Chen, L. Zhao, *Catal. Commun.* **2015**, *72*, 38–42
- [13] D. Wang, S. Dong, L. Wen, W. Yu, Z. He, Q. Guo, X. Lu, L. Wang, S. Song, J. Ma, *Chemosphere* **2022**, *291*, 132889.
- [14] Y. Xing, M. Cui, P. Fan, J. Ren, C. Zhang, N. Li, X. Wen, X. Ji, *Mater. Chem. Phys.* **2019**, *237*, 121826.
- [15] H. Wu, J. Song, C. Xie, Y. Hu, J. Ma, Q. Qian, B. Han, *Green Chem.* **2018**, *20*, 4602–4606.
- [16] N. Zhang, D. Li, X. Wang, R. Cai, C.-L. Dong, T. Thi Thuy Nga, L. Zhang, D. Yang, *Appl. Catal. B* **2023**, *326*, 122404.
- [17] Q. Wang, Y. Guan, J. Yan, Y. Liu, Q. Shao, F. Ning, J. Yi, *Dalton Trans.* **2023**, *52*, 4136–4141
- [18] X. Sun, X. Shao, J. Yi, J. Zhang, Y. Liu, *Chemosphere* **2022**, *293*, 133595.
- [19] Z. Zhang, C. Liu, J. T. Brosnahan, H. Zhou, W. Xu, S. Zhang, *J. Mater. Chem. A* **2019**, *7*, 23775–23780.
- [20] W. Yu, L. Wen, J. Gao, S. Chen, Z. He, D. Wang, Y. Shen, S. Song, *Chem. Commun.* **2021**, *57*, 7418–7421.
- [21] S. Chen, L.-H. Chung, S. Chen, Z. Jiang, N. Li, J. Hu, W.-M. Liao, J. He, *Small* **2024**, *20*, 2400978.
- [22] J. Wang, H. Wang, Z. Han, J. Han, *Front. Chem. Sci. Eng.* **2015**, *9*, 57–63.

- [23] T. Zheng, C. Liu, C. Guo, M. Zhang, X. Li, Q. Jiang, W. Xue, H. Li, A. Li, C.-W. Pao, J. Xiao, C. Xia, J. Zeng, *Nat. Nanotechnol.* **2021**, *16*, 1386.
- [24] Y. Xu, X. Liu, M. Jiang, B. Chi, Y. Lu, J. Guo, Z. Wang, S. Cui, *J. Colloid Interf. Sci.* **2024**, *665*, 365–375.
- [25] C. Jiang, S. Zeng, J. Feng, G. Li, B. Hai, K. Peng, X. Zhang, *J. Mater. Chem. A*, **2024**, *12*, 14809–14815.
- [26] G. Sun, C. Zou, W. Sun, Y. Fang, S. He, Y. Liu, J. Zhang, Y. Zhu, J. Wang, *Mater. Chem. Front.* **2023**, *7*, 3382–3389.
